# Supplementary material for: Modulating Brain Connectivity by Simultaneous Dual-Mode Stimulation over Bilateral Primary Motor Cortices in Subacute Stroke Patients
Source: PubMed Central journal article supplement (PMC5831930; doi:10.1155/2018/1458061), 2018-02-13
Supplement: 1458061.f1.pdf [file 1458061.f1.pdf]

Supplementary Table 1. Repeated measures ANOVA tables

| Figure 1A                             |                |                    |             |       |               |
|---------------------------------------|----------------|--------------------|-------------|-------|---------------|
| Source                                | Sum of Squares | Degrees of Freedom | Mean Square | F     | P             |
| Time                                  | 0.00322        | 1                  | 0.00322     | 0.42  | 0.5237        |
| Group                                 | 0.02424        | 1                  | 0.02424     | 2.44  | 0.1327        |
| Interaction                           | 0.00860        | 1                  | 0.00860     | 1.12  | 0.3012        |
| Error                                 | 0.16879        | 22                 | 0.00767     |       |               |
| Total                                 | 0.20485        | 25                 |             |       |               |
| Figure 1B                             |                |                    |             |       |               |
| Time                                  | 0.01268        | 1                  | 0.01268     | 1.74  | 0.2009        |
| Group                                 | 0.01928        | 1                  | 0.01928     | 1.62  | 0.2169        |
| Interaction                           | 0.00354        | 1                  | 0.00354     | 0.49  | 0.4932        |
| Error                                 | 0.16046        | 22                 | 0.00729     |       |               |
| Total                                 | 0.19596        | 25                 |             |       |               |
| Figure 1C                             |                |                    |             |       |               |
| Time                                  | 0.00211        | 1                  | 0.00211     | 0.16  | 0.6895        |
| Group                                 | 0.00059        | 1                  | 0.00059     | 0.02  | 0.8758        |
| Interaction                           | 0.01020        | 1                  | 0.01020     | 0.79  | 0.3835        |
| Error                                 | 0.28388        | 22                 | 0.01290     |       |               |
| Total                                 | 0.29678        | 25                 |             |       |               |
| Figure 1D                             |                |                    |             |       |               |
| Time                                  | 0.00892        | 1                  | 0.00892     | 1.18  | 0.2898        |
| Group                                 | 0.01250        | 1                  | 0.01250     | 0.76  | 0.3932        |
| Interaction                           | 0.06907        | 1                  | 0.06907     | 9.1   | <b>0.0063</b> |
| Error                                 | 0.16691        | 22                 | 0.00759     |       |               |
| Total                                 | 0.25740        | 25                 |             |       |               |
| Figure 1E                             |                |                    |             |       |               |
| Time                                  | 0.00342        | 1                  | 0.00342     | 1.35  | 0.2581        |
| Group                                 | 0.00211        | 1                  | 0.00211     | 0.3   | 0.5909        |
| Interaction                           | 0.02466        | 1                  | 0.02466     | 9.72  | <b>0.0050</b> |
| Error                                 | 0.05580        | 22                 | 0.00254     |       |               |
| Total                                 | 0.08599        | 25                 |             |       |               |
| Figure 1F                             |                |                    |             |       |               |
| Time                                  | 0.03575        | 1                  | 0.03575     | 5.8   | 0.0248        |
| Group                                 | 0.00029        | 1                  | 0.00029     | 0.01  | 0.9058        |
| Interaction                           | 0.05898        | 1                  | 0.05898     | 9.57  | <b>0.0053</b> |
| Error                                 | 0.13559        | 22                 | 0.00616     |       |               |
| Total                                 | 0.23061        | 25                 |             |       |               |
| Figure 2 (weighed network efficiency) |                |                    |             |       |               |
| Time                                  | 0.00003        | 1                  | 0.00003     | 0.02  | 0.8799        |
| Group                                 | 0.00463        | 1                  | 0.00463     | 1.49  | 0.2351        |
| Interaction                           | 0.01417        | 1                  | 0.01417     | 10.91 | <b>0.0032</b> |
| Error                                 | 0.02856        | 22                 | 0.00130     |       |               |
| Total                                 | 0.04739        | 25                 |             |       |               |
| Figure 2 (binary network efficiency)  |                |                    |             |       |               |
| Time                                  | 0.00035        | 1                  | 0.00035     | 0.26  | 0.6123        |

|             |         |    |         |      |               |
|-------------|---------|----|---------|------|---------------|
| Group       | 0.02115 | 1  | 0.02115 | 2.79 | 0.1088        |
| Interaction | 0.01311 | 1  | 0.01311 | 9.80 | <b>0.0049</b> |
| Error       | 0.02942 | 22 | 0.00134 |      |               |
| Total       | 0.06403 | 25 |         |      |               |

---
